# Supplementary material
Source: Springer Nature journal article supplement (https://www.springermedizin.de/resource/supplementary/13058_2010_2859_MOESM9_ESM.pdf/9702726)

**A**

MDA-MB-231/pBabe MDA-MB-231/pBIRF5

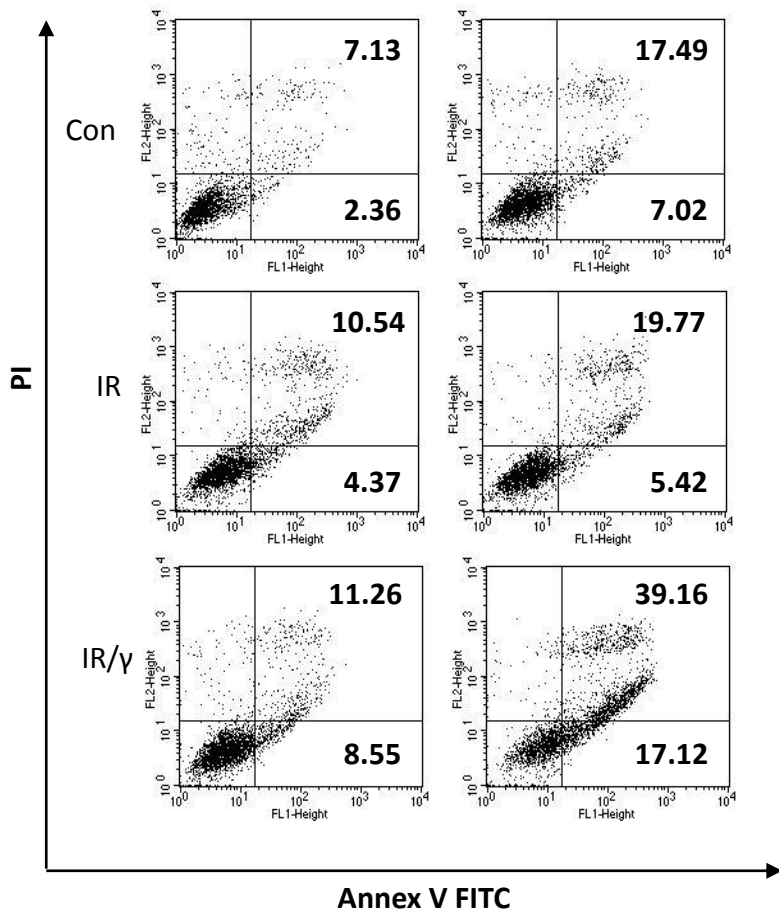**B**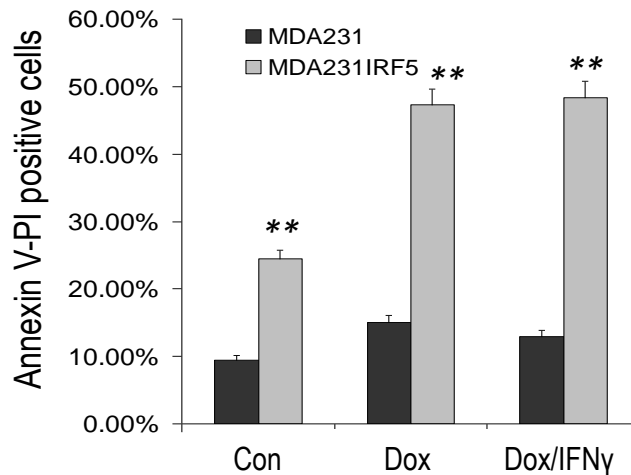**C**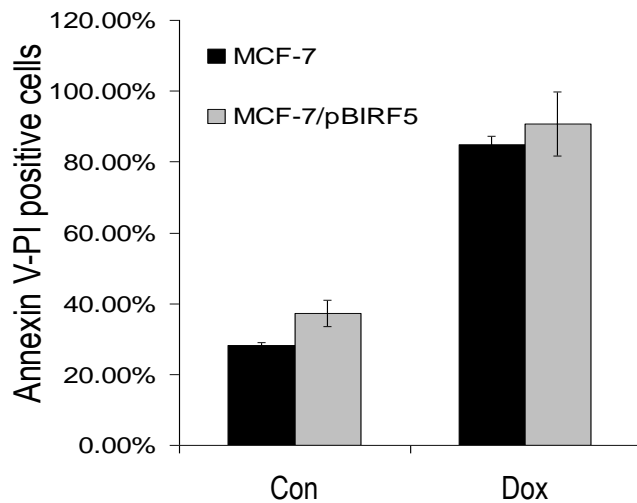

Supplement: MOESM9 [file 9702726]
